# Supplementary material for: Lower incidence of respiratory infections among iron-deficient children in Kilimanjaro, Tanzania
Source: PubMed Central journal article supplement (PMC5570096; doi:10.1093/emph/eox010), 2017-06-28
Supplement: eox010_Supp_1.pdf [file eox010_Supp_1.pdf]

Supplemental Table 1. Logistic regression models evaluating associations between iron status and prevalent infectious disease (reference: iron replete)

|                                                                         | Model 1:<br>Crude <sup>a</sup> |            |         | Model 2:<br>Adjusted for identified<br>confounders <sup>b</sup> |             |         | Model 3:<br>Adjusted for all individual<br>characteristics <sup>c</sup> |             |         |
|-------------------------------------------------------------------------|--------------------------------|------------|---------|-----------------------------------------------------------------|-------------|---------|-------------------------------------------------------------------------|-------------|---------|
|                                                                         | OR                             | 95% CI     | P-value | aOR                                                             | 95% CI      | P-value | aOR                                                                     | 95% CI      | P-value |
| <b>Outcome: physician's diagnosis of any infectious disease</b>         |                                |            |         |                                                                 |             |         |                                                                         |             |         |
| Iron deficient erythropoiesis                                           | 0.69                           | 0.32, 1.51 | 0.359   | 0.84                                                            | 0.34, 2.06  | 0.698   | 0.79                                                                    | 0.31, 2.01  | 0.614   |
| Iron deficiency anemia                                                  | 1.42                           | 0.62, 3.28 | 0.407   | 2.42                                                            | 0.87, 6.79  | 0.091   | 2.90                                                                    | 1.02, 8.30  | 0.047   |
| Non-iron deficiency anemia                                              | 1.56                           | 0.67, 3.62 | 0.300   | 1.92                                                            | 0.75, 4.94  | 0.174   | 2.10                                                                    | 0.80, 5.52  | 0.131   |
| Age                                                                     |                                |            |         | 0.91                                                            | 0.71, 1.17  | 0.455   | 0.90                                                                    | 0.69, 1.17  | 0.421   |
| Male sex                                                                |                                |            |         | 0.68                                                            | 0.34, 1.36  | 0.274   | 0.64                                                                    | 0.32, 1.31  | 0.225   |
| Triceps skinfold thickness                                              |                                |            |         | 0.84                                                            | 0.73, 0.96  | 0.008   | 0.83                                                                    | 0.72, 0.95  | 0.008   |
| Early weaning                                                           |                                |            |         |                                                                 |             |         | 1.79                                                                    | 0.79, 4.09  | 0.165   |
| Earth housing material                                                  |                                |            |         |                                                                 |             |         | 1.04                                                                    | 0.51, 2.12  | 0.906   |
| Cattle ownership                                                        |                                |            |         |                                                                 |             |         | 1.17                                                                    | 0.56, 2.44  | 0.680   |
| <b>Outcome: physician's diagnosis of malaria</b>                        |                                |            |         |                                                                 |             |         |                                                                         |             |         |
| Iron deficient erythropoiesis                                           | 1.25                           | 0.42, 3.70 | 0.691   | 1.37                                                            | 0.40, 4.74  | 0.620   | 1.44                                                                    | 0.41, 5.08  | 0.568   |
| Iron deficiency anemia                                                  | 1.80                           | 0.54, 6.02 | 0.337   | 3.75                                                            | 0.95, 14.76 | 0.059   | 4.45                                                                    | 1.10, 18.00 | 0.036   |
| Non-iron deficiency anemia                                              | 1.11                           | 0.27, 4.51 | 0.884   | 1.41                                                            | 0.34, 5.92  | 0.637   | 1.37                                                                    | 0.32, 5.84  | 0.666   |
| Age                                                                     |                                |            |         | 1.09                                                            | 0.77, 1.54  | 0.637   | 1.06                                                                    | 0.73, 1.52  | 0.762   |
| Male sex                                                                |                                |            |         | 0.33                                                            | 0.11, 0.97  | 0.044   | 0.33                                                                    | 0.11, 0.98  | 0.045   |
| Triceps skinfold thickness                                              |                                |            |         | 0.91                                                            | 0.76, 1.08  | 0.261   | 0.90                                                                    | 0.76, 1.07  | 0.249   |
| Early weaning                                                           |                                |            |         |                                                                 |             |         | 0.95                                                                    | 0.28, 3.23  | 0.940   |
| Earth housing material                                                  |                                |            |         |                                                                 |             |         | 0.96                                                                    | 0.36, 2.55  | 0.942   |
| Cattle ownership                                                        |                                |            |         |                                                                 |             |         | 1.51                                                                    | 0.53, 4.33  | 0.439   |
| <b>Outcome: physician's diagnosis of respiratory infectious disease</b> |                                |            |         |                                                                 |             |         |                                                                         |             |         |
| Iron deficient erythropoiesis                                           | 0.62                           | 0.25, 1.54 | 0.302   | 0.63                                                            | 0.21, 1.92  | 0.413   | 0.51                                                                    | 0.15, 1.70  | 0.272   |
| Iron deficiency anemia                                                  | 0.95                           | 0.34, 2.64 | 0.928   | 1.58                                                            | 0.46, 5.43  | 0.465   | 1.75                                                                    | 0.50, 6.07  | 0.379   |
| Non-iron deficiency anemia                                              | 1.03                           | 0.37, 2.87 | 0.950   | 1.69                                                            | 0.57, 4.99  | 0.345   | 1.87                                                                    | 0.62, 5.67  | 0.268   |
| Age                                                                     |                                |            |         | 0.86                                                            | 0.64, 1.16  | 0.326   | 0.86                                                                    | 0.63, 1.17  | 0.338   |
| Male sex                                                                |                                |            |         | 0.75                                                            | 0.33, 1.70  | 0.487   | 0.67                                                                    | 0.29, 1.57  | 0.360   |
| Triceps skinfold thickness                                              |                                |            |         | 0.82                                                            | 0.70, 0.96  | 0.016   | 0.81                                                                    | 0.68, 0.96  | 0.016   |
| Early weaning                                                           |                                |            |         |                                                                 |             |         | 1.91                                                                    | 0.73, 4.98  | 0.188   |
| Earth housing material                                                  |                                |            |         |                                                                 |             |         | 1.24                                                                    | 0.53, 2.92  | 0.609   |
| Cattle ownership                                                        |                                |            |         |                                                                 |             |         | 0.72                                                                    | 0.30, 1.68  | 0.435   |

| Outcome: elevated biomarkers of inflammation <sup>d</sup> |      |            |       |      |            |       |      |            |       |
|-----------------------------------------------------------|------|------------|-------|------|------------|-------|------|------------|-------|
| Iron deficient erythropoiesis                             | 1.00 | 0.55, 1.79 | 0.991 | 0.76 | 0.39, 1.46 | 0.408 | 0.75 | 0.38, 1.48 | 0.415 |
| Iron deficiency anemia                                    | 2.63 | 1.19, 5.80 | 0.017 | 2.25 | 0.87, 5.82 | 0.095 | 2.70 | 0.99, 7.41 | 0.053 |
| Non-iron deficiency anemia                                | 1.57 | 0.74, 3.31 | 0.239 | 1.53 | 0.67, 3.51 | 0.310 | 1.61 | 0.69, 3.73 | 0.271 |
| Age                                                       |      |            |       | 0.87 | 0.71, 1.06 | 0.172 | 0.88 | 0.71, 1.08 | 0.226 |
| Male sex                                                  |      |            |       | 0.90 | 0.52, 1.57 | 0.709 | 0.84 | 0.47, 1.49 | 0.546 |
| Triceps skinfold thickness                                |      |            |       | 0.96 | 0.88, 1.06 | 0.416 | 0.96 | 0.71, 1.08 | 0.226 |
| Early weaning                                             |      |            |       |      |            |       | 1.08 | 0.53, 2.18 | 0.836 |
| Earth housing material                                    |      |            |       |      |            |       | 1.62 | 0.92, 2.88 | 0.097 |
| Cattle ownership                                          |      |            |       |      |            |       | 1.26 | 0.70, 2.27 | 0.449 |

<sup>a</sup> N = 283 for models of physician's diagnoses; N = 265 for model of elevated biomarkers of inflammation

<sup>b</sup> N = 239 for models of physician's diagnoses; N = 224 for model of elevated biomarker of inflammation

<sup>c</sup> N = 233 for models of physician's diagnoses; N = 219 for model of elevated biomarker of inflammation

<sup>d</sup> Elevated C-reactive protein (CRP) or  $\alpha_1$ -acid glycoprotein [28]

OR: odds ratio; aOR: adjusted odds ratio; CI: confidence interval

Supplemental Table 2. Logistic regression models evaluating associations between iron status and DTH-*Candida*<sup>a</sup> (reference: iron replete)

|                                                  | Model 1:<br>Crude <sup>a</sup> |            |         | Model 2:<br>Adjusted for identified<br>confounding variables <sup>b</sup> |            |         | Model 3:<br>Adjusted for all potentially<br>confounding variables <sup>c</sup> |            |         |
|--------------------------------------------------|--------------------------------|------------|---------|---------------------------------------------------------------------------|------------|---------|--------------------------------------------------------------------------------|------------|---------|
|                                                  | OR                             | 95% CI     | P-value | aOR                                                                       | 95% CI     | P-value | aOR                                                                            | 95% CI     | P-value |
| <b>Outcome: DTH-<i>Candida</i></b>               |                                |            |         |                                                                           |            |         |                                                                                |            |         |
| Iron deficient erythropoiesis                    | 1.14                           | 0.65, 2.00 | 0.656   | 1.33                                                                      | 0.74, 2.39 | 0.340   | 1.40                                                                           | 0.70, 2.76 | 0.347   |
| Iron deficiency anemia                           | 1.71                           | 0.84, 3.48 | 0.139   | 2.34                                                                      | 1.08, 5.07 | 0.031   | 2.60                                                                           | 0.99, 6.85 | 0.053   |
| Non-iron deficiency anemia                       | 1.14                           | 0.56, 2.33 | 0.716   | 1.27                                                                      | 0.61, 2.63 | 0.516   | 1.39                                                                           | 0.60, 3.20 | 0.444   |
| Age                                              |                                |            |         | 1.20                                                                      | 1.02, 1.40 | 0.027   | 1.35                                                                           | 1.09, 1.68 | 0.006   |
| Male sex                                         |                                |            |         |                                                                           |            |         | 1.12                                                                           | 0.63, 1.99 | 0.696   |
| Triceps skinfold thickness                       |                                |            |         |                                                                           |            |         | 1.08                                                                           | 0.98, 1.19 | 0.129   |
| Elevated biomarkers of inflammation <sup>d</sup> |                                |            |         |                                                                           |            |         | 0.77                                                                           | 0.43, 1.36 | 0.365   |
| Early weaning                                    |                                |            |         |                                                                           |            |         | 1.11                                                                           | 0.55, 2.24 | 0.776   |
| Earth housing material                           |                                |            |         |                                                                           |            |         | 0.74                                                                           | 0.42, 1.31 | 0.309   |
| Cattle ownership                                 |                                |            |         |                                                                           |            |         | 0.88                                                                           | 0.49, 1.31 | 0.671   |

<sup>a</sup>N = 283

<sup>b</sup>N = 283

<sup>c</sup>N = 219

<sup>d</sup>Elevated C-reactive protein (CRP) or  $\alpha_1$ -acid glycoprotein (AGP) [28]

DTH-*Candida*: Delayed-type hypersensitivity to *Candida albicans*; OR: odds ratio; aOR: adjusted odds ratio; CI: confidence interval

Supplemental Table 3. Cox proportional hazards models evaluating associations between iron status and incident infectious disease (reference: iron replete)

|                                                                         | Model 1:<br>Crude |            |       | Model 2:<br>Adjusted for identified<br>confounders |            |       | Model 3:<br>Adjusted for all individual<br>characteristics |            |       |
|-------------------------------------------------------------------------|-------------------|------------|-------|----------------------------------------------------|------------|-------|------------------------------------------------------------|------------|-------|
|                                                                         | HR                | 95% CI     | P     | aHR                                                | 95% CI     | P     | aHR                                                        | 95% CI     | P     |
| <b>Outcome: physician's diagnosis of any infectious disease</b>         |                   |            |       |                                                    |            |       |                                                            |            |       |
| Iron deficient erythropoiesis                                           | 0.62              | 0.32, 1.19 | 0.148 | 0.59                                               | 0.28, 1.24 | 0.162 | 0.60                                                       | 0.28, 1.29 | 0.191 |
| Iron deficiency anemia                                                  | 0.95              | 0.47, 1.92 | 0.879 | 1.02                                               | 0.45, 2.33 | 0.962 | 0.94                                                       | 0.40, 2.21 | 0.889 |
| Non-iron deficiency anemia                                              | 0.98              | 0.50, 1.91 | 0.943 | 0.91                                               | 0.44, 1.87 | 0.800 | 0.96                                                       | 0.46, 2.02 | 0.981 |
| Age                                                                     |                   |            |       |                                                    |            |       | 0.84                                                       | 0.68, 1.03 | 0.095 |
| Male sex                                                                |                   |            |       |                                                    |            |       | 1.06                                                       | 0.60, 1.87 | 0.846 |
| Triceps skinfold thickness                                              |                   |            |       | 1.00                                               | 0.91, 1.09 | 0.925 | 0.96                                                       | 0.86, 1.06 | 0.382 |
| Elevated biomarkers of inflammation <sup>a</sup>                        |                   |            |       | 1.10                                               | 0.63, 1.92 | 0.730 | 1.12                                                       | 0.63, 1.99 | 0.707 |
| Early weaning                                                           |                   |            |       |                                                    |            |       | 0.96                                                       | 0.48, 1.93 | 0.911 |
| Earth housing material                                                  |                   |            |       |                                                    |            |       | 0.66                                                       | 0.37, 1.17 | 0.153 |
| Cattle ownership                                                        |                   |            |       |                                                    |            |       | 0.98                                                       | 0.54, 1.80 | 0.960 |
| <b>Outcome: physician's diagnosis of malaria</b>                        |                   |            |       |                                                    |            |       |                                                            |            |       |
| Iron deficient erythropoiesis                                           | 0.77              | 0.18, 3.22 | 0.718 | 0.74                                               | 0.17, 3.21 | 0.686 | 0.67                                                       | 0.15, 2.99 | 0.598 |
| Iron deficiency anemia                                                  | 1.00              | 0.19, 5.15 | 0.999 | 1.27                                               | 0.23, 6.87 | 0.783 | 1.04                                                       | 0.18, 6.10 | 0.959 |
| Non-iron deficiency anemia                                              | 1.47              | 0.35, 6.18 | 0.595 | 1.60                                               | 0.37, 6.81 | 0.527 | 1.62                                                       | 0.37, 7.10 | 0.523 |
| Age                                                                     |                   |            |       |                                                    |            |       | 0.84                                                       | 0.55, 1.28 | 0.410 |
| Male sex                                                                |                   |            |       |                                                    |            |       | 1.10                                                       | 0.35, 3.51 | 0.870 |
| Triceps skinfold thickness                                              |                   |            |       | 1.06                                               | 0.89, 1.25 | 0.519 | 1.04                                                       | 0.85, 1.26 | 0.716 |
| Elevated biomarkers of inflammation <sup>a</sup>                        |                   |            |       | 0.62                                               | 0.20, 1.87 | 0.394 | 0.63                                                       | 0.20, 1.95 | 0.420 |
| Early weaning                                                           |                   |            |       |                                                    |            |       | 1.25                                                       | 0.33, 4.80 | 0.742 |
| Earth housing material                                                  |                   |            |       |                                                    |            |       | 0.77                                                       | 0.24, 2.41 | 0.648 |
| Cattle ownership                                                        |                   |            |       |                                                    |            |       | 0.69                                                       | 0.22, 2.19 | 0.533 |
| <b>Outcome: physician's diagnosis of respiratory infectious disease</b> |                   |            |       |                                                    |            |       |                                                            |            |       |
| Iron deficient erythropoiesis                                           | 0.31              | 0.10, 0.93 | 0.037 | 0.24                                               | 0.07, 0.87 | 0.030 | 0.23                                                       | 0.06, 0.84 | 0.027 |
| Iron deficiency anemia                                                  | 1.09              | 0.44, 2.67 | 0.854 | 0.93                                               | 0.31, 2.73 | 0.891 | 0.78                                                       | 0.26, 2.40 | 0.668 |
| Non-iron deficiency anemia                                              | 0.87              | 0.31, 2.40 | 0.786 | 0.76                                               | 0.25, 2.34 | 0.639 | 0.91                                                       | 0.29, 2.89 | 0.876 |
| Age                                                                     |                   |            |       |                                                    |            |       | 0.71                                                       | 0.52, 0.97 | 0.029 |
| Male sex                                                                |                   |            |       |                                                    |            |       | 1.31                                                       | 0.57, 3.02 | 0.526 |
| Triceps skinfold thickness                                              |                   |            |       | 1.05                                               | 0.93, 1.19 | 0.442 | 1.00                                                       | 0.87, 1.16 | 0.965 |
| Elevated biomarkers of inflammation <sup>a</sup>                        |                   |            |       | 0.96                                               | 0.44, 2.12 | 0.921 | 0.82                                                       | 0.36, 1.87 | 0.635 |

|                        |      |            |       |
|------------------------|------|------------|-------|
| Early weaning          | 1.03 | 0.40, 2.68 | 0.951 |
| Earth housing material | 0.64 | 0.27, 1.47 | 0.289 |
| Cattle ownership       | 0.89 | 0.38, 2.08 | 0.790 |

---

<sup>a</sup> Elevated C-reactive protein (CRP) or  $\alpha_1$ -acid glycoprotein (AGP) [28]  
HR: hazard ratio; aHR: adjusted hazard ratio; CI: confidence interval

---
